# Supplementary material
Source: publisher site journal article supplement (https://www.dovepress.com/article/supplementary_file/616533/616533%20Revised%20Supplementary%20Figure%20S1.docx)
Supplement: Supplementary file 1 [file 616533%20Revised%20Supplementary%20Figure%20S1.docx]

Supplementary Figure S1


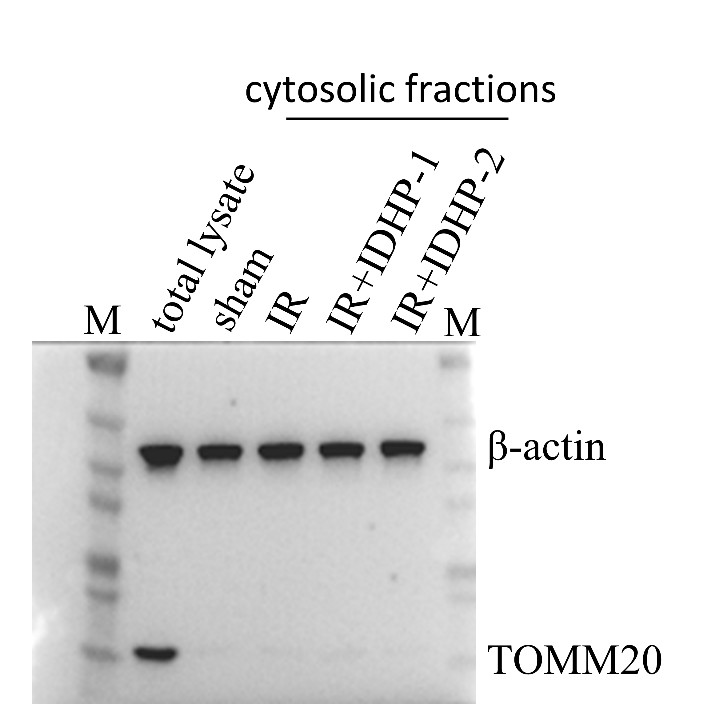


Figure S1, Quality control of cytosolic fraction preparation. β-actin was used as a loading marker, and TOMM20 was used to assess possible mitochondrial contamination. Total lysate was included as a positive control for TOMM20 detection. Cytosolic fractions showing clear β-actin signal and minimal TOMM20 signal.
